# Supplementary material for: Most primary olfactory neurons have individually neutral effects on behavior
Source: eLife. 2022 Jan 19;11:e71238. doi: 10.7554/eLife.71238 (PMC8806191; doi:10.7554/eLife.71238)
Supplement: Supplementary file 2. — RMSE scores were calculated with cross-validation for four models of ORN activity and odor preference. All RMSE scores are close to the standard deviation of the dependent variable (σ = 0.23). Sheet 2. Ten-fold cross-validation of single-ORN-valence-weighted prediction models. Sheet 3. A comparison of the experimental designs of two optogenetic studies investigating ORN-valence behaviour. Sheet 4. A list of ORN-Gal4 lines used in the study. [file elife-71238-supp2.xlsx]

## Sheet: 1-Cross-validation 1
Sheet 1. Ten-fold cross-validation of ORN–preference prediction models.
RMSE scores were calculated with cross-validation for four models of ORN activity and odor preference. All RMSE scores are close to the standard deviation of the dependent variable (𝞂 = 0.23).
Model	RMSE
Multiple Linear Regression	0.22
SVM - Linear	0.21
SVM - Polynomial	0.2
SVM - RBF	0.19

## Sheet: 2-Cross-validation 2
Sheet 2. Ten-fold cross-validation of single-ORN-valence-weighted prediction models.
RMSE scores were calculated with cross-validation for four models of ORN activity and odor preference. All RMSE scores are close to the standard deviation of the dependent variable (𝞂 = 0.23).
Model	RMSE
Multiple Linear Regression	0.22
SVM - Linear	0.22
SVM - Polynomial	0.2
SVM - RBF	0.2

## Sheet: 3-Compared
Sheet 3. A comparison of the experimental designs of two optogenetic studies investigating ORN-valence behaviour.
	Bell & Wilson, 2016	This study
Number of ORNs tested	8	45
Number of ORN pairs analyzed	36	7
Total study N of Gal4 controls	0	~5148
Total study N of UAS controls	88	~5148
Total study N of test flies	~2512	~5148
Independent genetic controls in experiments	No	Yes
Uses valence effect size	No	Yes
Number of light intensities	8	3
Receptor types assessed for airflow effect	1	45
Technical replicates per experiment	16	1
Optogenetic light duration (min)	64	9
Opsin type	Channelrhodoropsin-2	CsChrimson
Optogenetic light color	Blue	Red
Blind flies	Yes	No
Heat compensation	Yes	No
Highest optogenetic light intensity (μW/mm2)	1500	72
Optogenetic light-induced heat (°C)	Not reported	0.3
Chamber dimensions	50 × 5 × 1.2 mm	50 × 4 × 3 mm
Physiological characterization of stimulation	Yes	No
Fly transfer to chambers	Aspiration	Ice anesthesia

## Sheet: 4-Gal4s
Sheet 4. A list of ORN-Gal4 lines used in the study.
Gal4	Genotype	BDSC stock #
Or7a	w[*]; P{w[+mC]=Or7a-GAL4.C}214t1.1	23908
Or9a	w[*]; P{w[+mC]=Or9a-GAL4.C}106t6.1/TM3, Sb[1]	23918
Or10a	w[*]; P{w[+mC]=Or10a-GAL4.F}34.2A; TM2/TM6B, Tb[1]	9944
Or13a	w[*]; P{w[+mC]=Or13a-GAL4.C}229t56.2/TM3, Sb[1]	23886
Or19a	w[*]; P{w[+mC]=Or19a-GAL4.F}61.2	9948
Or19b	w[*]; P{w[+mC]=Or19b-GAL4.C}218t6.1	23889
Or22a	w[*]; P{w[+mC]=Or22a-GAL4.7.717}14.2	9951
Or22b	w[1118]; P{w[+mC]=Or22b-GAL4.10287}105.2	23289
Or23a	w[*]; P{w[+mC]=Or23a-GAL4.7.818}17.2	9955
Or33a	w[*]; Bl[1]/CyO; P{w[+mC]=Or33a-GAL4.F}126.4A	9962
Or33b	w[*]; Bl[1]/CyO; P{w[+mC]=Or33b-GAL4.F}83.14/TM6B, Tb[1]	9963
Or33c	w[*]; P{w[+mC]=Or33c-GAL4.F}78.3	9966
Or35a	w[*]; P{w[+mC]=Or35a-GAL4.F}109.3	9968
Or42a	w[*]; P{w[+mC]=Or42a-GAL4.F}48.1	9969
Or42b	w[*]; P{w[+mC]=Or42b-GAL4.F}64.1	9972
Or43a	w[*]; P{w[+mC]=Or43a-GAL4.W}27.6	9974
Or43b	w[*]; P{w[+mC]=Or43b-GAL4.C}110t6.3	23895
Or46a	w[*]; P{w[+mC]=Or46a-GAL4.1.875}9.10A	9979
Or47a	w[*]; P{w[+mC]=Or47a-GAL4.8.239}15.4A	9982
Or47b	w[*]; P{w[+mC]=Or47b-GAL4.7.467}15.6	9984
Or49a	w[*]; P{w[+mC]=Or49a-GAL4.F}47.2A	9985
Or49b	w[*]; P{w[+mC]=Or49b-GAL4.F}80.1	9986
Or56a	w[*]; P{w[+mC]=Or56a-GAL4.C}113t53.2	23896
Or59b	w[*]; P{w[+mC]=Or59b-GAL4.C}114t2.2	23897
Or59c	w[*]; P{w[+mC]=Or59c-GAL4.C}129t1.1	23899
Or65a	w[*]; P{w[+mC]=Or65a-GAL4.F}72.5	9993
Or65b	w[*]; P{w[+mC]=Or65b-GAL4.C}198t57.1	23902
Or65c	w[*]; P{w[+mC]=Or65c-GAL4.C}221t53.1/TM3, Sb[1]	23903
Or67a	w[*]; P{w[+mC]=Or67a-GAL4.C}137t3.3	23904
Or67b	w[*]; P{w[+mC]=Or67b-GAL4.F}68.3/TM6B, Tb[1]	9995
Or67c	w[*]; P{w[+mC]=Or67c-GAL4.C}116t3.2/CyO	23905
Or67d	w[*]; P{w[+mC]=Or67d-GAL4.F}57.2	9998
Or69a	w[*]; P{w[+mC]=Or69a-GAL4.F}81.4	10000
Or71a	w[*]; P{w[+mC]=Or71a-GAL4.F}30.4	23122
Or82a	w[*]; P{w[+mC]=Or82a-GAL4.F}135.1; TM2/TM6B, Tb[1]	23125
Or83c	w[*]; P{w[+mC]=Or83c-GAL4.F}73.4A	23132
Or85a	w[*]; P{w[+mC]=Or85a-GAL4.F}67.4	24461
Or85b	w[*]; P{w[+mC]=Or85b-GAL4.C}179t55.1	23912
Or85d	w[*]; P{w[+mC]=Or85d-GAL4.C}143t2.1	24148
Or85e	w[1118]; P{w[+mC]=Or85e-GAL4.W}2.19.1	23293
Or85f	w[*]; P{w[+mC]=Or85f-GAL4.F}44.6	23136
Or88a	w[*]; P{w[+mC]=Or88a-GAL4.F}52.1	23137
Or92a	w[*]; P{w[+mC]=Or92a-GAL4.F}62.1	23139
Or98a	w[*]; P{w[+mC]=Or98a-GAL4.F}115.1	23141
Orco	w[*]; P{w[+mC]=Orco-GAL4.W}11.17; TM2/TM6B, Tb[1]	26818
